# Supplementary material for: Endogenous mitochondrial NAD(P)H fluorescence can predict lifespan
Source: PubMed Central journal article supplement — Commun Biol. 2024 Nov 21;7:1551. doi: 10.1038/s42003-024-07243-w (PMC11582643; doi:10.1038/s42003-024-07243-w), 2024-11-21
Supplement: 42003_2024_7243_MOESM2_ESM.pdf [file 42003_2024_7243_MOESM2_ESM.pdf]

## Description of Additional Supplementary Files

**File name:** Supplementary Data 1

**Description:** Mitochondrial B.A./NAD(P)H FLIM Data By Mitochondria

**File name:** Supplementary Data 2

**Description:** Mitochondrial B.A./NAD(P)H FLIM Data By Animal

**File name:** Supplementary Data 3

**Description:** Additional Numerical Source Data
